# Supplementary material for: The CRISPR/Cas9 Minipig—A Transgenic Minipig to Produce Specific Mutations in Designated Tissues
Source: MDPI journal article supplement (doi:10.3390/cancers13123024), 2021-06-16
Supplement: s1 [file s1]

# Supplementary Materials: The CRISPR/Cas9 Minipig—A Transgenic Minipig to Produce Specific Mutations in Designated Tissues

Martin Fogtmann Berthelsen, Maria Riedel, Huiqiang Cai, Søren H. Skaarup, Aage K.O. Alstrup, Frederik Dagnæs-Hansen, Yonglun Luo, Uffe B. Jensen, Henrik Hager, Ying Liu, Henrik Callesen, Mikkel H. Vendelbo, Jannik E. Jakobsen and Martin Kristian Thomsen

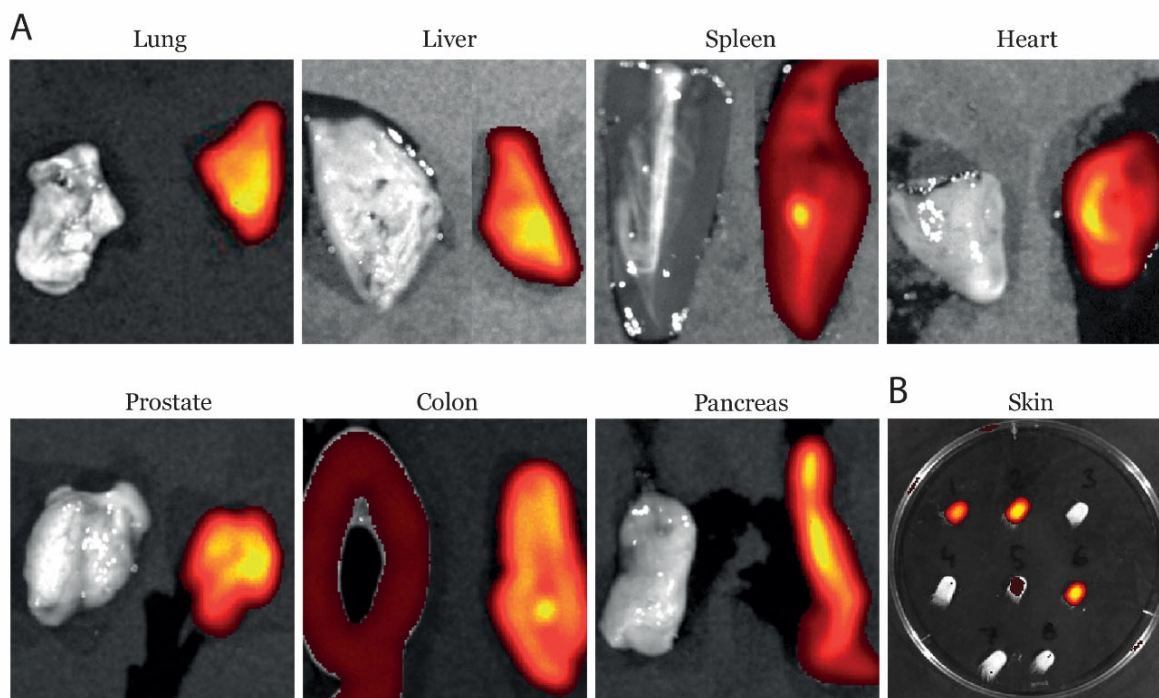

**Figure S1.** Transgenic expression. (A) IVIS scanning of tissues biopsies from a euthanized Cas9 pig verified transgene RFP expression in major organs. As a negative control tissue biopsies from a Danish Landrace pig were used. (B) IVIS scan of ear biopsies from a F1 litter.

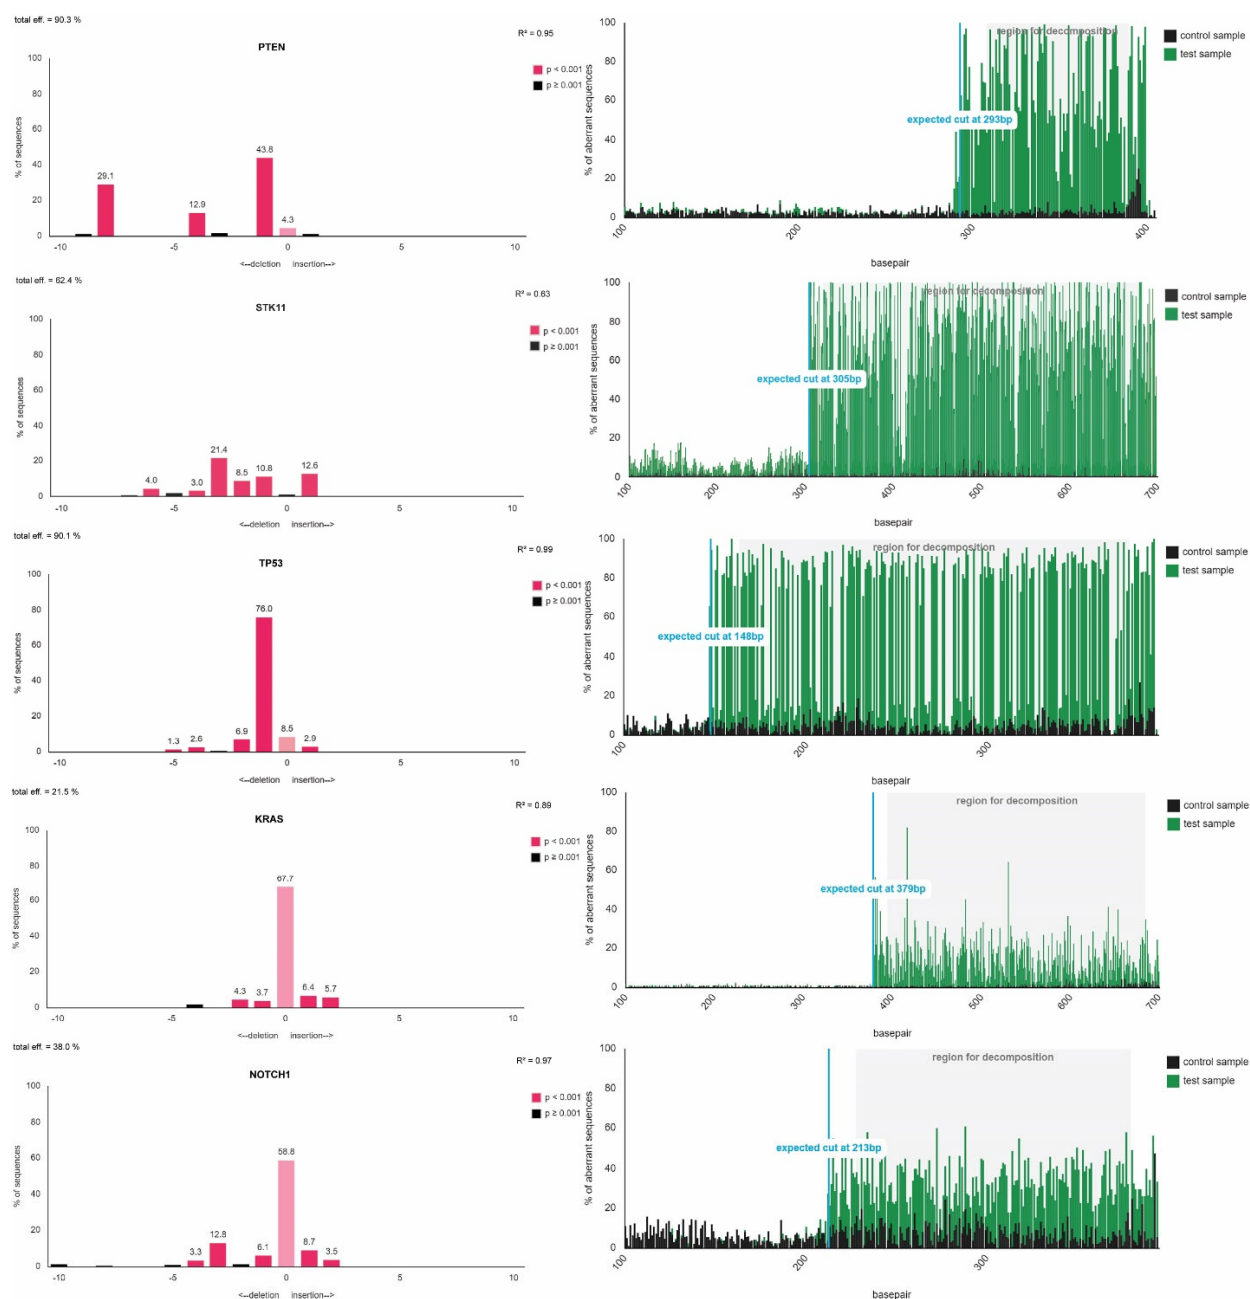

**Figure S2.** Validation of sgRNA in porcine fibroblast. Porcine fibroblasts transfected with the specified sgRNAs to determine guide efficiency. Mutations efficiency was assessed by TIDE analysis: Tracking of Indels by Decomposition software.

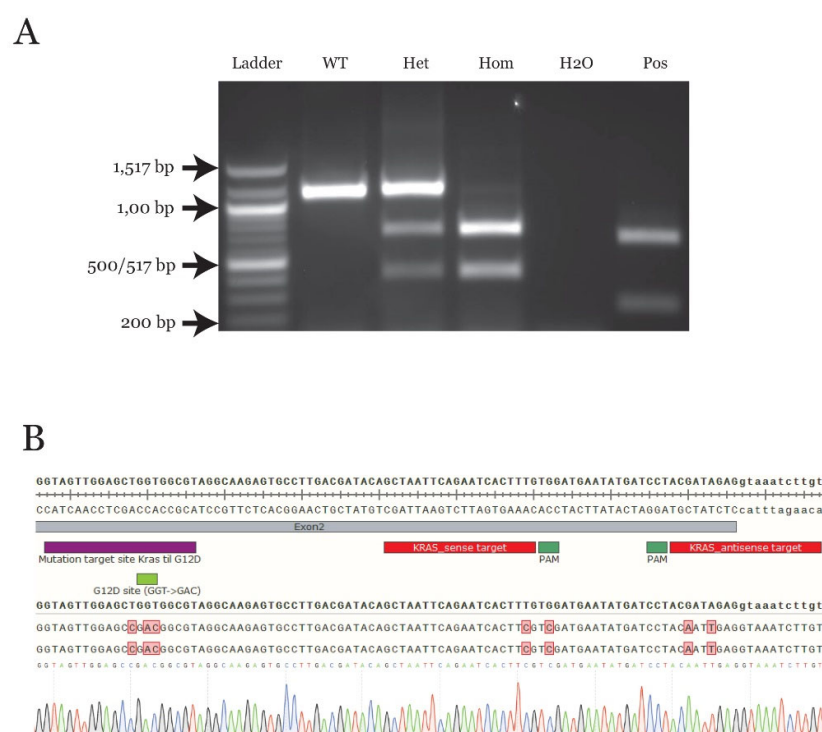

**Figure S3.** Introduction of KRAS<sup>G12D</sup> point mutation by HDR. **(A)** The introduction of the KRAS<sup>G12D</sup> point mutation by CRISPR HDR was assessed in single clones. Fibroblast from Cas9 transgene pic was co-transfected with sgRNA for KRAS and a KRAS<sup>G12D</sup> repair template. Introduction of KRAS<sup>G12D</sup> generated a restriction site and clones were analysed by PCR followed by a enzymatic digestion for the present of the new restriction site; KRAS<sup>G12D</sup> mutated clones revealed two bands and non-mutated clones had a single band. Heterozygotes revealed three bands, one corresponding to the WT band and two to the cleaved mutated allele. Positive control was the KRAS<sup>G12D</sup> template. **(B)** Sanger sequencing verified that the DNA sequence of the KRAS gene was identical to the sequence of the KRAS<sup>G12D</sup> HDR template. Western Blot images can be found in Figure S7.

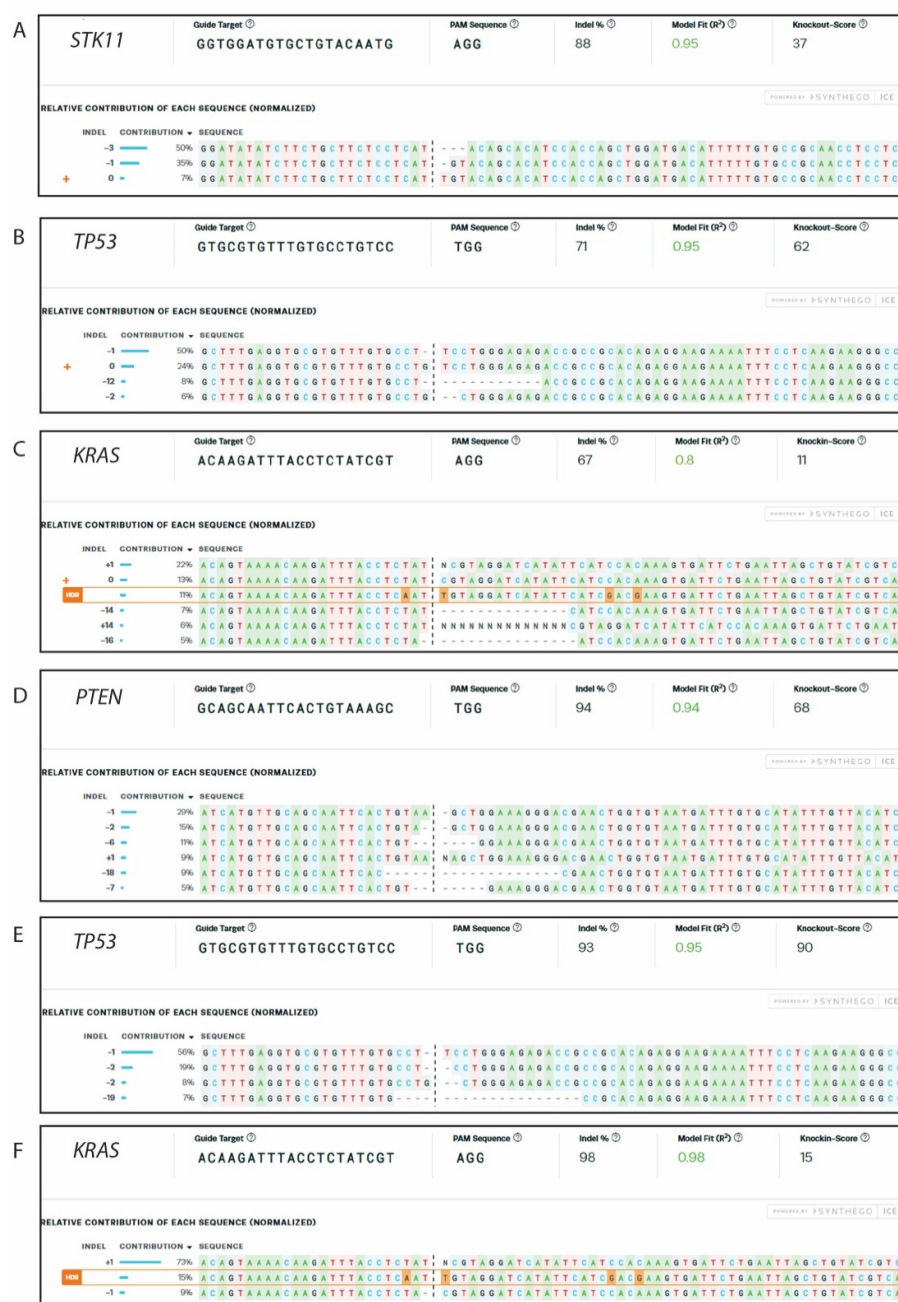

**Figure S4.** ICE analysis for AAV induces mutations in vitro. (A) *STK11* mutations in SKT\_AAV2H22 transduced Cas9 fibroblasts. (B) *TP53* mutations in SKT\_AAV2H22 transduced Cas9 fibroblasts. (C) *KRAS* mutations and *KRAS*<sup>G12D</sup> repair in SKT\_AAV2H22 transduced Cas9 fibroblasts. (D) *PTEN* mutations in PTK\_AAV9 transduced Cas9 fibroblasts. (E) *TP53* mutations in PTK\_AAV9 transduced Cas9 fibroblasts. (F) *KRAS* mutations and *KRAS*<sup>G12D</sup> repair in PTK\_AAV9 transduced Cas9 fibroblasts.



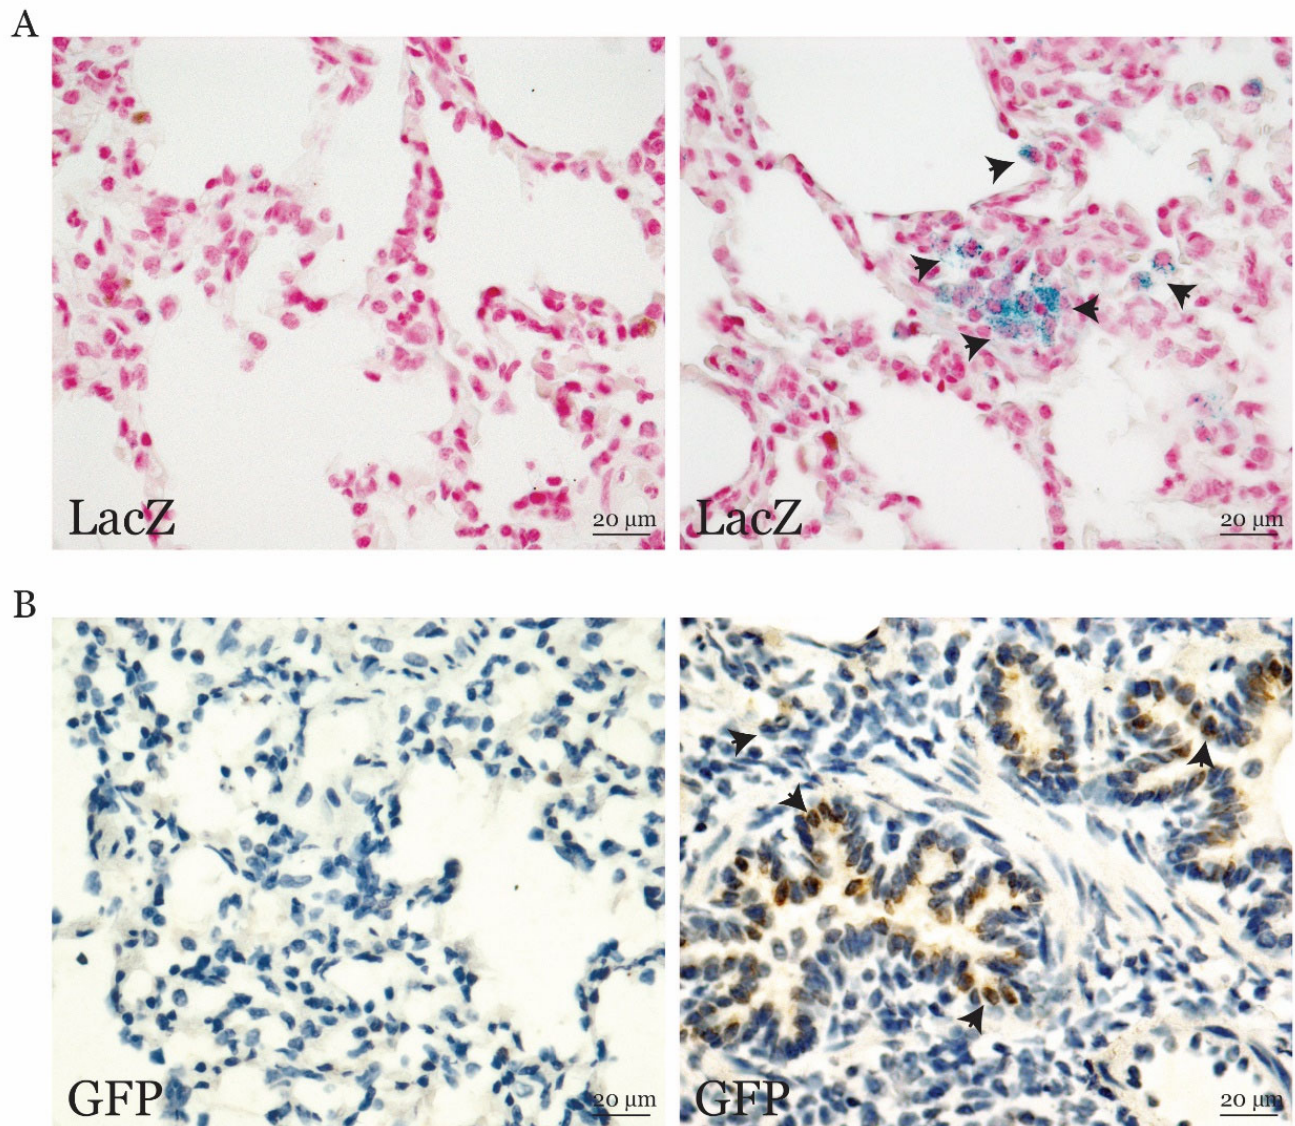

**Figure S5.** AAV targeting of pig lung epithelium. (A)  $\beta$ -galactosidase for LacZ in LacZ\_AAV2H22 treated (right) and non-treated (left) porcine lungs. (B) Immunohistochemically staining for GFP in GFP\_AAV9 treated (right) and non-treated (left) porcine lungs. Arrowheads mark positive cells.

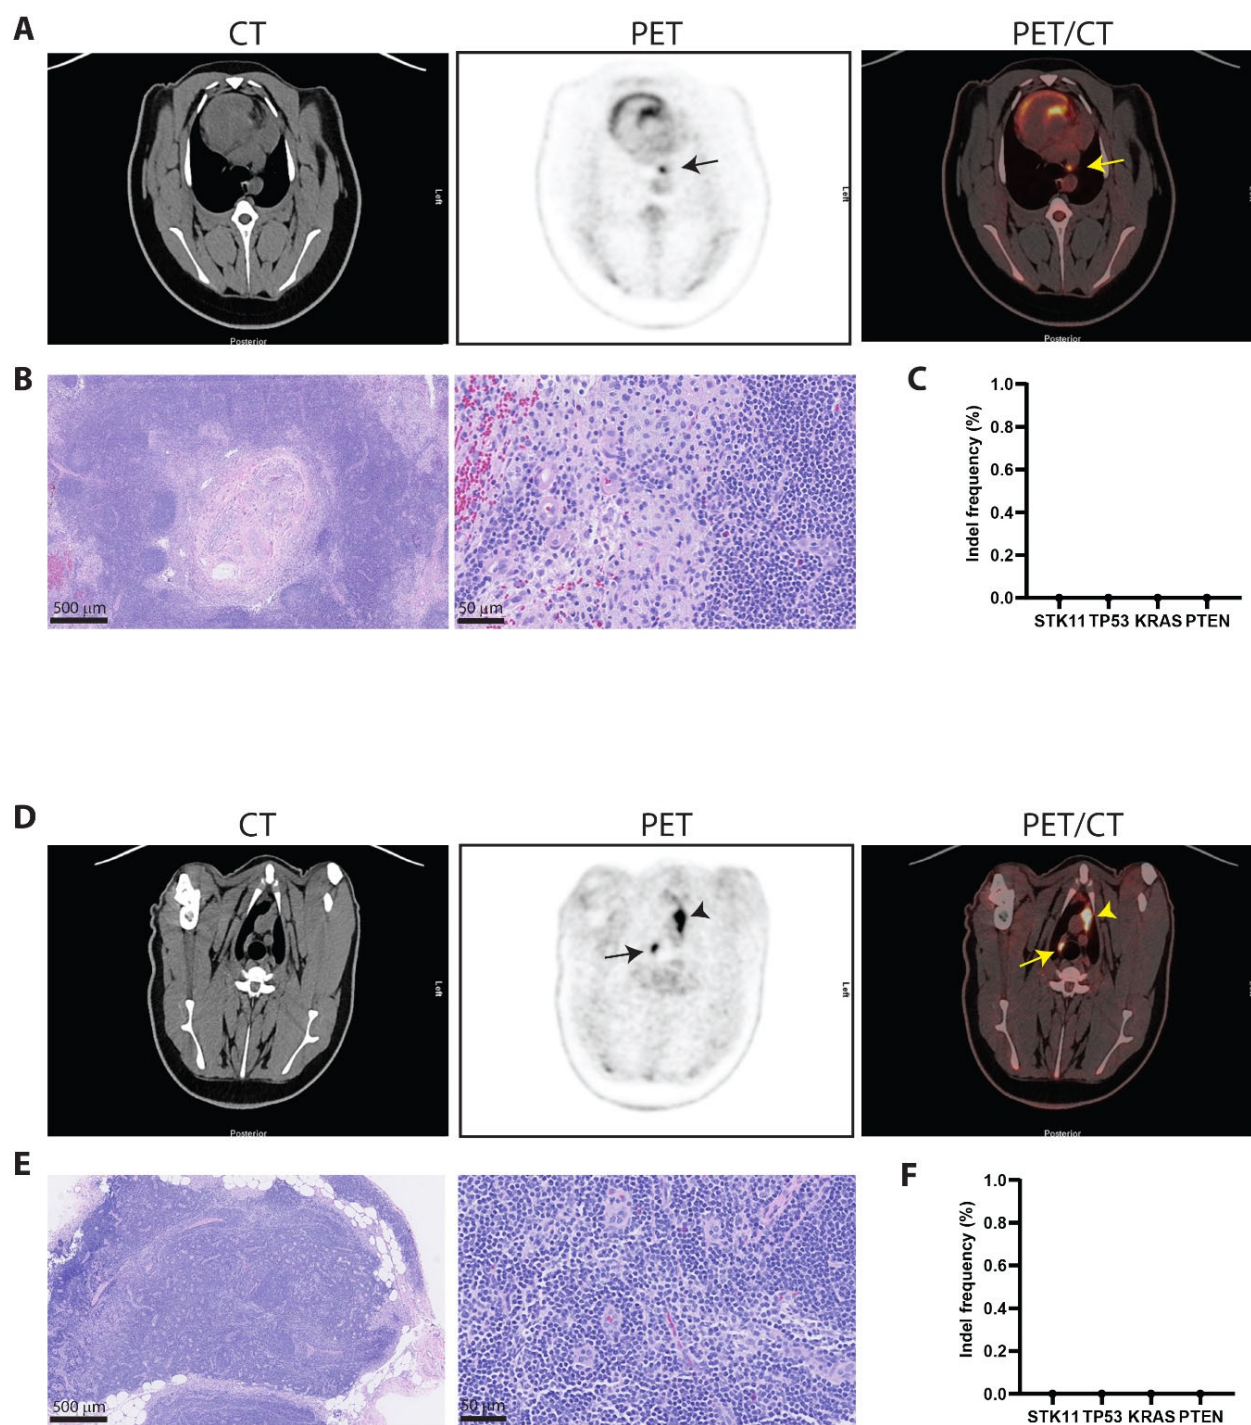

**Figure S6.** Activated lymph nodes. Activated lymph nodes were detected by increased  $^{18}\text{F}$ -FDG signal by PET/CT scans. (A,D) PET/CT scans from two Cas9 mini pigs 18 months post AAV transduction. Arrows mark the activated lymph nodes and arrowhead mark thymus. Representative images are shown. (B,E) Histological sections from activated lymph nodes stained with H&E. (C,F) Indel analysis for CRISPR induced mutations in the four target genes. No Indels were detected by the Sanger sequencing.

SB - Figure 1

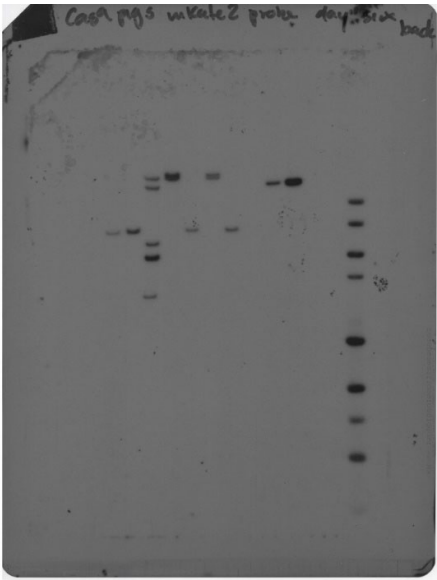

Viral DNA - Figure 4

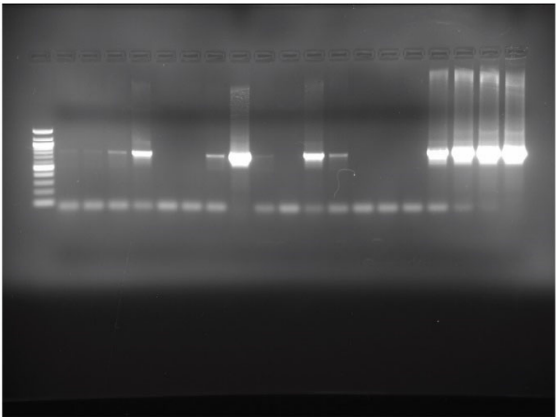

Recombination  
Figure 4

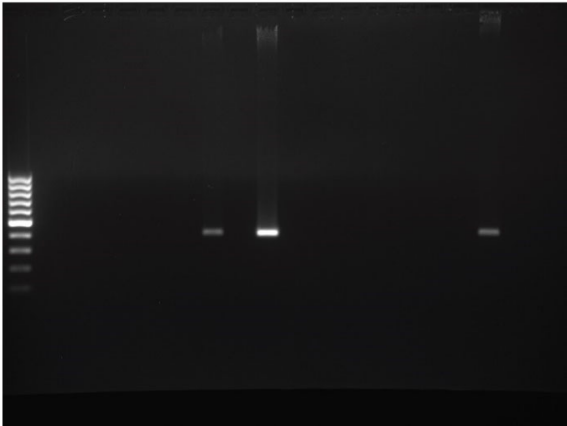

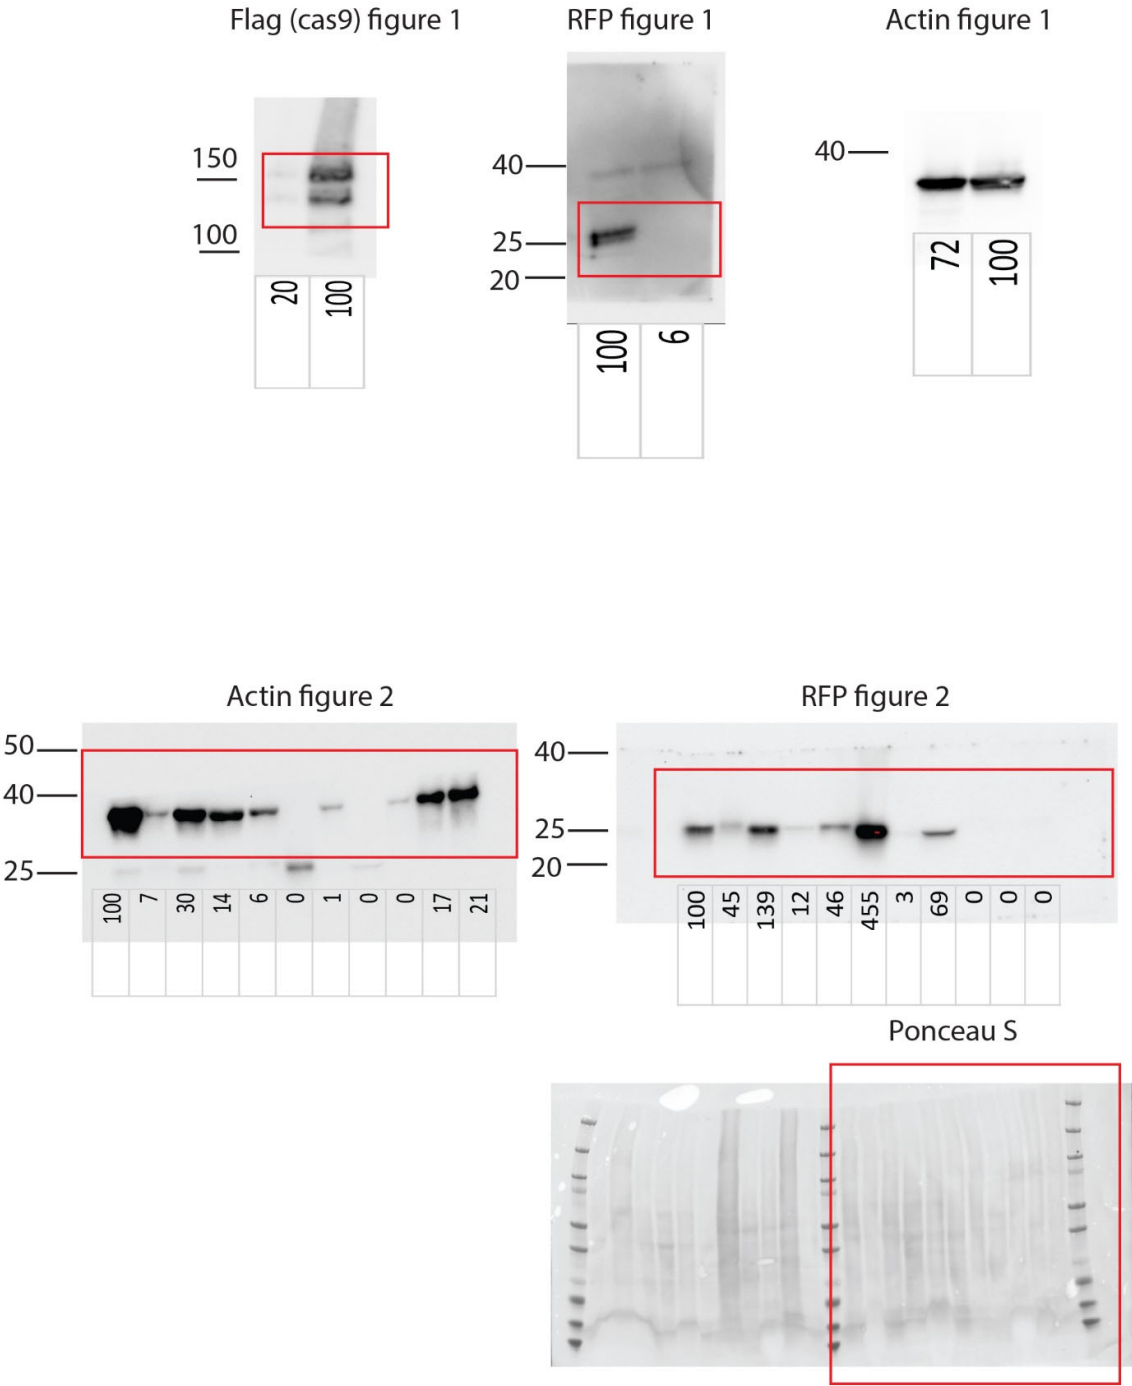



Figure 3

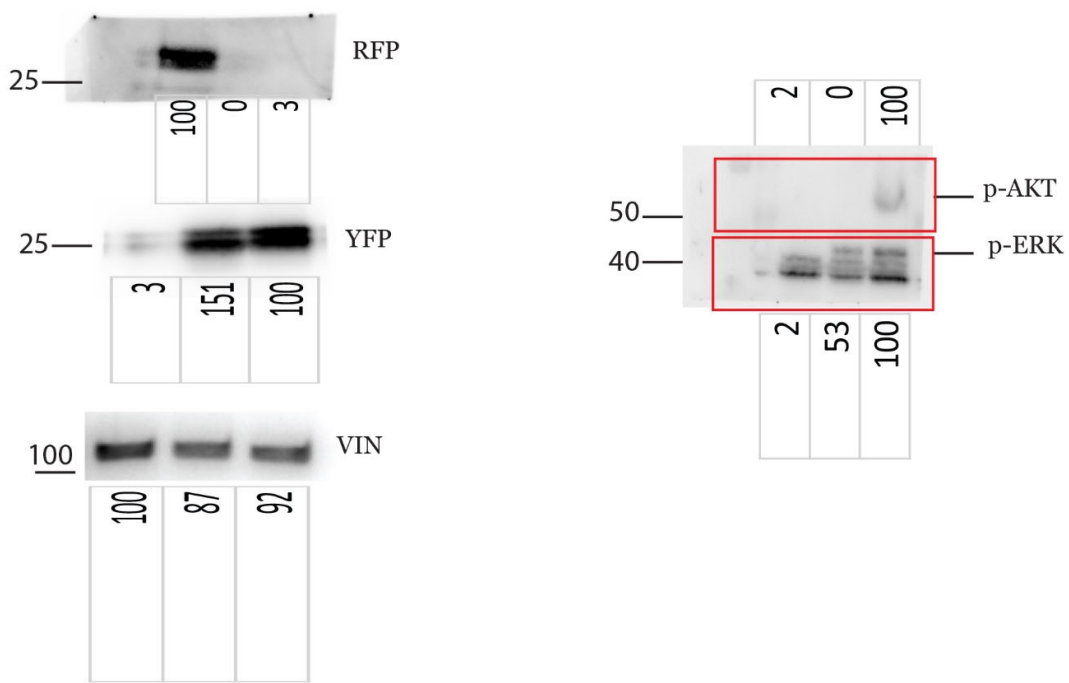

Flag (cas9) figure 5

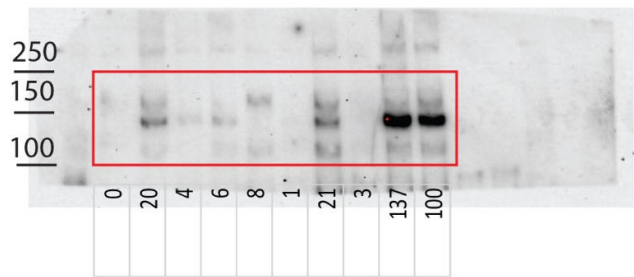

Actin figure 5

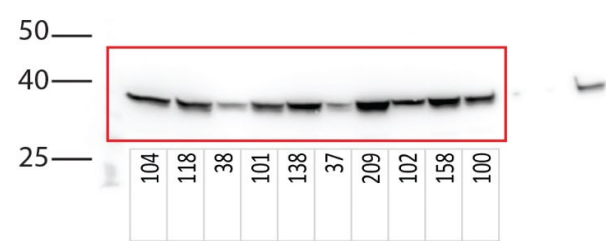

Figure S7. Uncropped Western Blot and Southern Blot images.

Table S1. Primers.

| Primer:              | Sequence:                  |
|----------------------|----------------------------|
| KRAS_sgRNA_F         | caccGACAAGATTTACCTCTATCGT  |
| KRAS_sgRNA_R         | aaacACGATAGAGGTAATCTTGTC   |
| KRAS_seq_F           | AGTGAAGTCATGGCCCACTC       |
| KRASG12D_seq_F       | AGGCCTGCTGAAAATGACTGA      |
| KRAS_seq_R           | AAACACCAAAAACCCCATACG      |
| TP53_sgRNA_F         | caccGTGCGTGTTTGTGCCTGTCC   |
| TP53_sgRNA_R         | aaacGGACAGGCACAAACACGCAC   |
| TP53_seq_F           | GGCTTCTTGATCAGCTGGAG       |
| TP53_seq_R           | TCGCCATCCAGTGGCTTCTTC      |
| STK11_sgRNA_F        | caccGGTGGATGTGCTGTACAATG   |
| STK11_sgRNA_R        | aaacCATTGTACAGCACATCCACC   |
| STK11_seq_F          | ATTCTTTGGGGCTGCTCTCC       |
| STK11_seq_R          | AGCCATAGAGGGGGCAACTA       |
| PTEN_sgRNA_F         | caccGCAGCAATTCAGTGAATGCTGC |
| PTEN_sgRNA_R         | aaacGCTTTACAGTGAATGCTGC    |
| PTEN_seq_F           | TTGGCCTCCCTATCTAATGG       |
| PTEN_seq_R           | CTCTGGTCCTTACTTCCCCAT      |
| NOTCH1_sgRNA_F       | caccGCGTAGTCCACCACACCGCCG  |
| NOTCH1_sgRNA_R       | aaacCGGCGGTGTGGTGGACTACGC  |
| NOTCH1_seq_F         | GGGTACAGTTCCTGTTGTT        |
| NOTCH1_seq_R         | GGCCCTTGGGTGTCCTTAC        |
| Activation_primary_F | CAGCCATTGCCTTTTATGGT       |
| Activation_primary_R | TGTCGCCCTCGAACTTCAC        |
| Activation_nested_F  | GCTGGTTGTTGTGCTGTCTC       |
| Activation_nested_R  | AAGTCGTGCTGCTTCATGTG       |
| AAV_presence_F       | ATCAGCAAGGAGATGATCGC       |
| AAV_presence_R       | TTAGCTGTATCGTCAAGGCACTC    |
| AAV_titration_F      | GGAACCCCTAGTGATGGAGTT      |
| AAV_titration_R      | CGGCCTCAGTGAGCGA           |
